# Supplementary material for: Graphene layer-controlled bismuth ferrite nanocomposites with enhanced bandgap engineering and piezophotocatalytic activity
Source: Royal Society of Chemistry journal article supplement (doi:10.1039/d5tc03424h), 2025-12-22
Supplement: d5tc03424h1.pdf [file d5tc03424h1.pdf]

## Graphene Layer–Controlled Bismuth Ferrite Nanocomposites with Enhanced Bandgap Engineering and Piezophotocatalytic Activity

Anjali Varshney<sup>1,2</sup>, Sunil Chauhan<sup>1,2\*</sup>, Subhash Sharma<sup>3</sup>

<sup>1</sup>Department of Physics & Environmental Sciences, Sharda School of Engineering & Science, Sharda University, Uttar Pradesh 201310, India

<sup>2</sup>Centre for Solar Cell and Renewable Energy, Department of Physics & Environmental Sciences, Sharda School of Engineering & Science, Sharda University, Uttar Pradesh 201310, India

<sup>3</sup>SECIHTI-Centro de Nanociencias y Nanotecnología, Universidad Nacional Autónoma de México, Km. 107 Carretera Tijuana-Ensenada, AP 14, Ensenada, 22860, B.C., Mexico

\*Corresponding author email: [sunil.chauhan@sharda.ac.in](mailto:sunil.chauhan@sharda.ac.in)

Dr. Sunil Chauhan (Associate Professor)

Department of Physics, & Environmental Sciences, Sharda School of Engineering & Science, Sharda University,

Phone: +91-9582592923

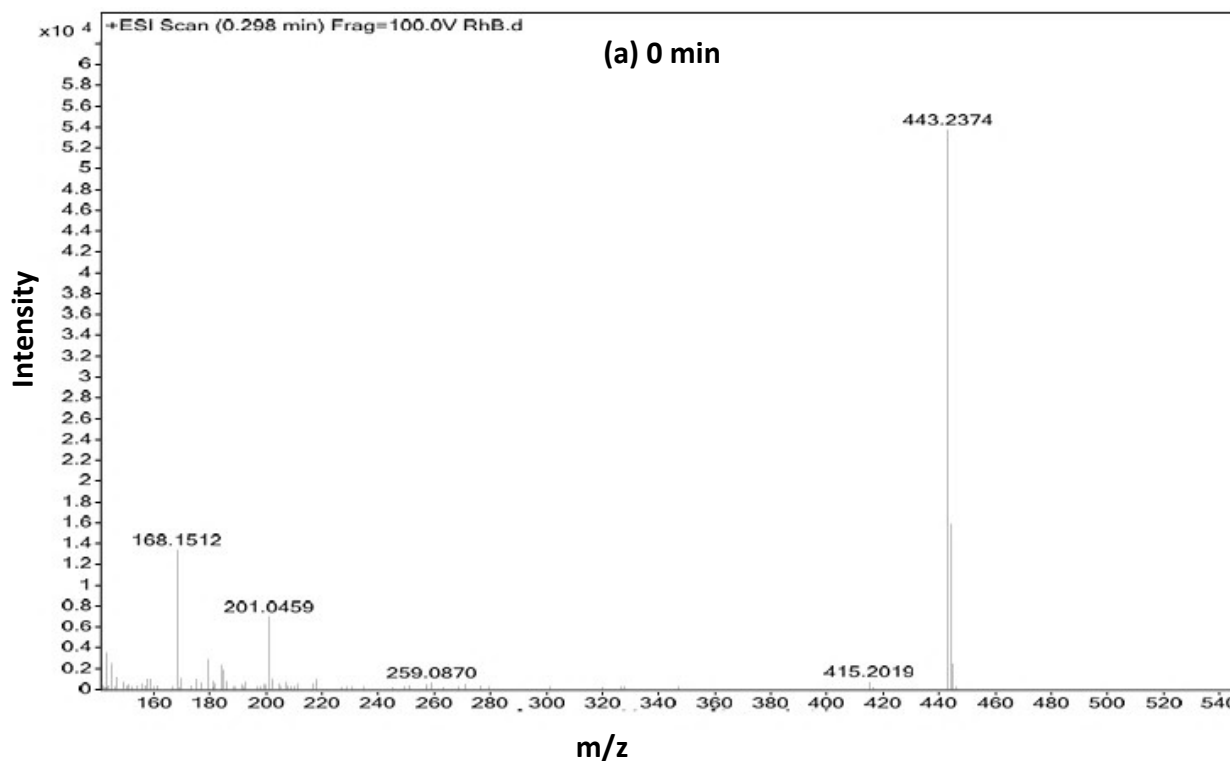

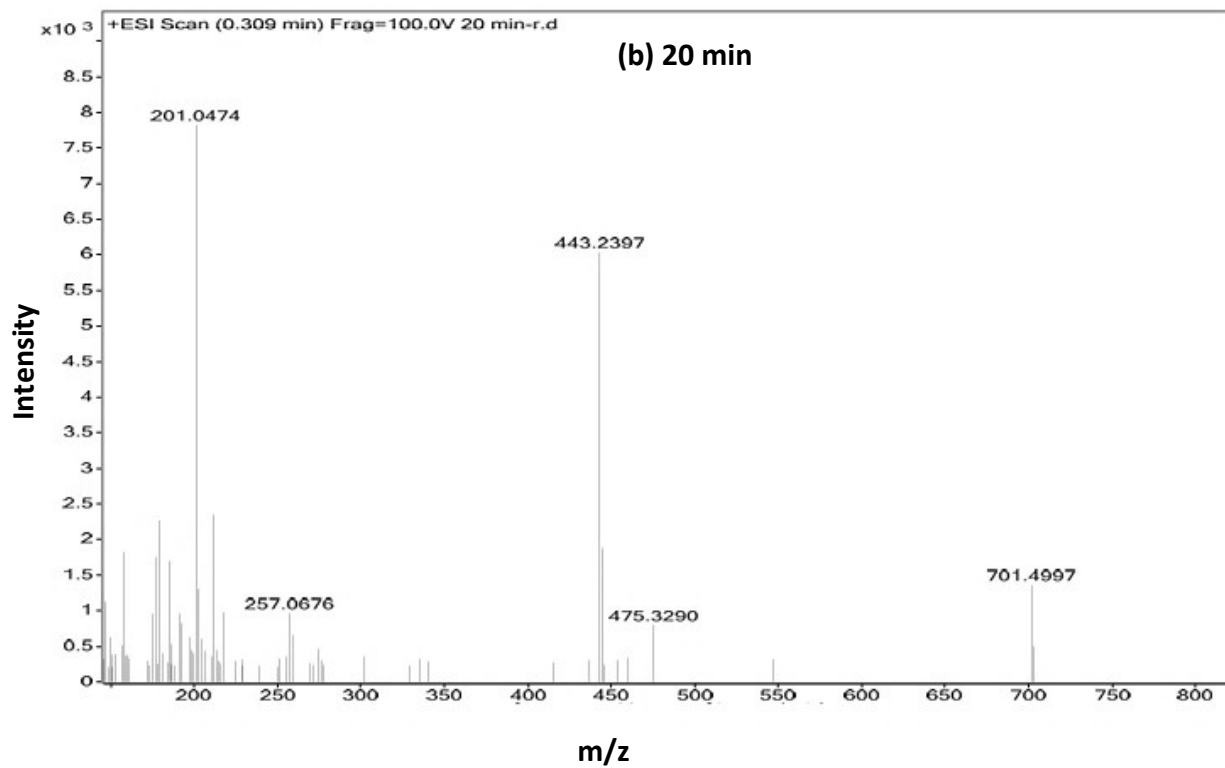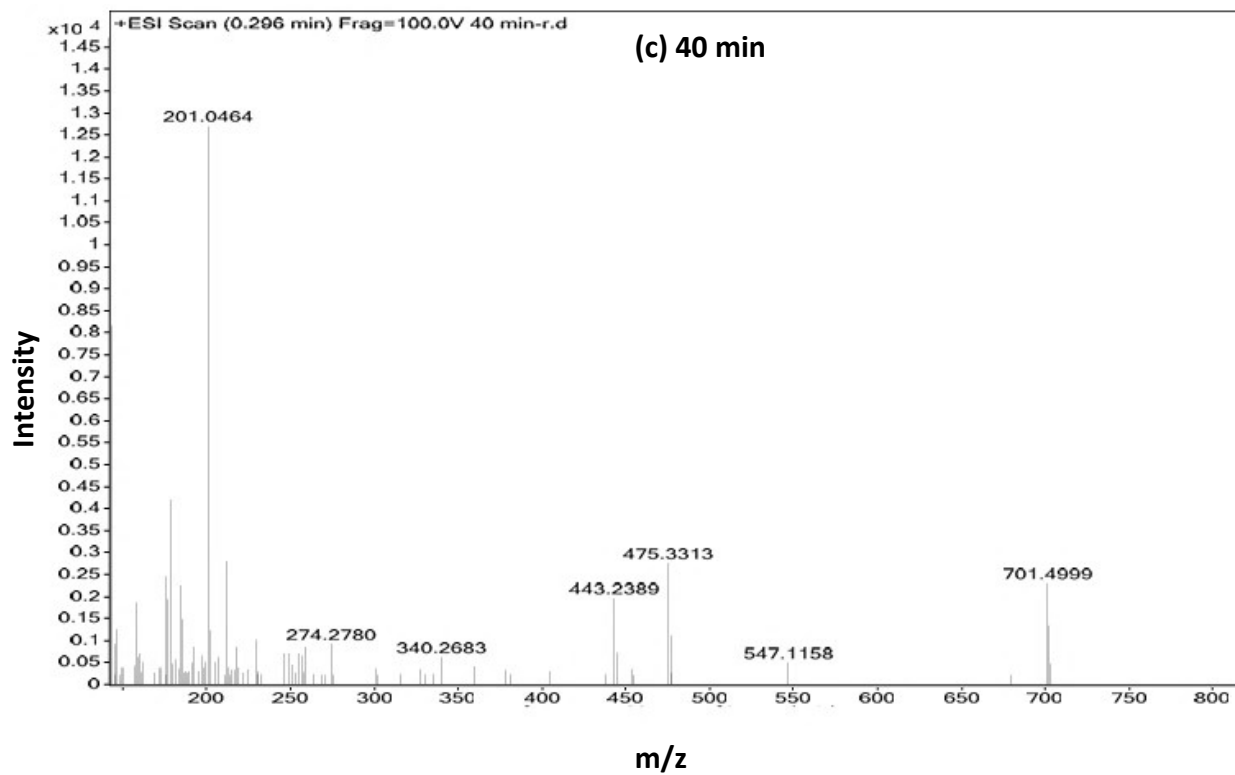

**Figure 1S.** High-resolution mass spectrometry (HRMS) plot of RhB degradation over BFO–Gr3–5 nanocomposites collected at (a) 0 min, (b) 20 min, and (c) 40 min, illustrating the sequential formation and disappearance of degradation intermediates during the piezo-photocatalytic process.
